# Supplementary material
Source: PubMed Central journal article supplement (PMC3871781)
Supplement: ASN.2013050453_ASN2013050453SupplementaryData.pdf [file ASN.2013050453_ASN2013050453SupplementaryData.pdf]

## **SUPPLEMENTAL RESULTS**

Supplemental Figure 1. CasCADE platform (Capture and Sequencing of Complement-Associated Disease Exons) includes 1,071 exons in 85 complement/coagulation genes, with a length of 198,457 base pairs. Targeted sequence is captured using a modified Agilent SureSelect protocol.

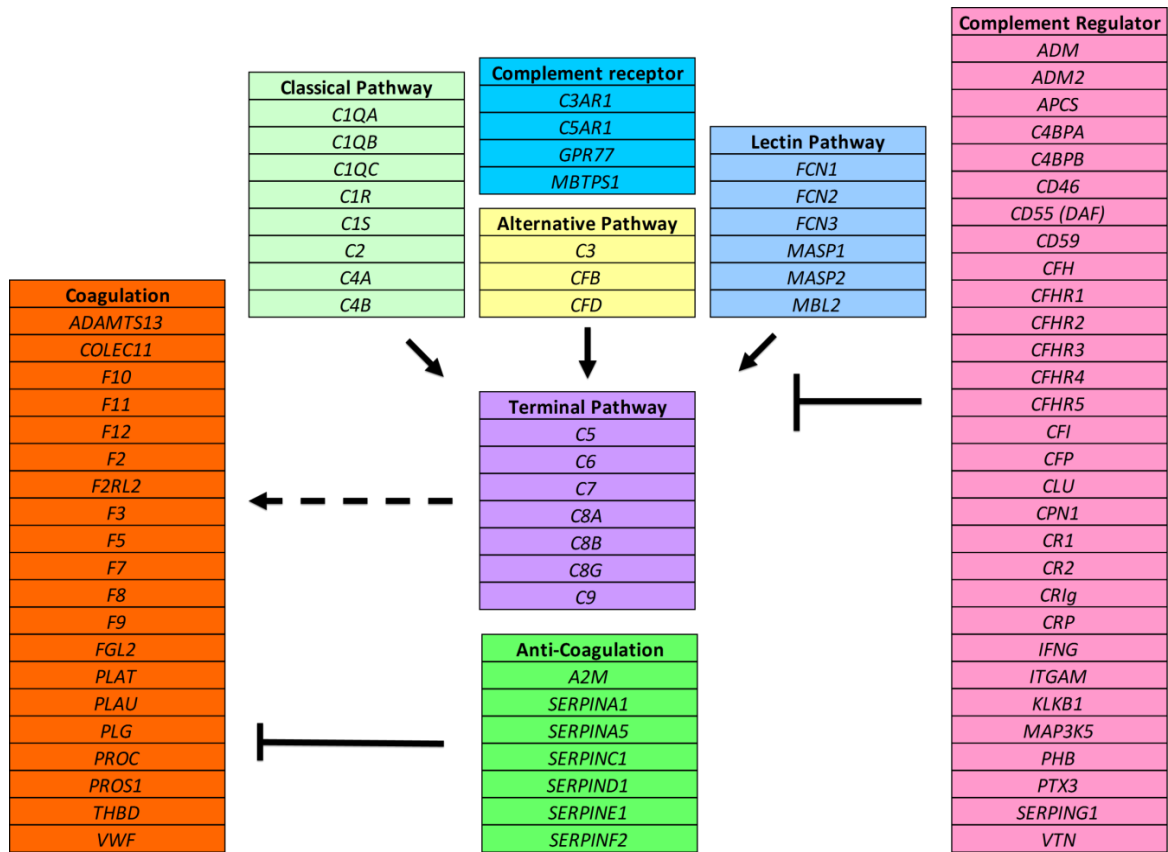

Supplemental Figure 1.

Supplemental table 1: Identification of novel nonsynonymous rare variants

| Gene            | Nucleotide              | AA Change    | Pathology |
|-----------------|-------------------------|--------------|-----------|
| <i>FCN1</i>     | c.685 G>A               | p.A229T      | 1         |
| <i>F5</i>       | <sup>1</sup> c.3221 A>G | p.N1074S     | 3         |
| <i>MBTPS1</i>   | c.2658 G>T              | p.Q886H      | 2         |
| <i>CR1</i>      | c.997 A>G               | p.R333G      | -         |
| <i>C3</i>       | c.188 C>T               | p.P63L       | 3         |
| <i>C3</i>       | c.3085 G>A              | p.D1029N     | 6         |
| <i>VWF</i>      | c.4165 G>C              | p.E1389Q     | 4         |
| <i>KLKB1</i>    | c.514 C>A               | p.P172T      | 0         |
| <i>ADAMTS13</i> | c.3056 T>C              | p.M1019T     | 0         |
| <i>MASP2</i>    | c.1633 A>G              | p.N545D      | 4         |
| <i>CR1</i>      | c.4750 C>T              | p.R1584W     | 4         |
| <i>C2</i>       | c.443_453 del           | p.148_151del | -         |
| <i>CFH</i>      | c.272 C>G               | p.T91S       | 2         |
| <i>F12</i>      | c.193 G>A               | p.G65S       | 3         |
| <i>CFH</i>      | c.1160-2 A>G            |              | -         |
| <i>MASP1</i>    | c.1770 del G            | p.G590fs     | -         |
| <i>CFH</i>      | c.595 A>G               | p.S199G      | 4         |

<sup>1</sup> Mutation carried by two patients.

Supplemental table 2: Patients carrying multiple deleterious variants

| Patients | Gene         | Nucleotide   | AA change | <sup>1</sup> Pathology Score | <sup>2</sup> MAF (EVS_EA) | dbSNP 137   | Reference                           |
|----------|--------------|--------------|-----------|------------------------------|---------------------------|-------------|-------------------------------------|
| 1        | <i>CD46</i>  | c.692 C>G    | p.P231R   | 6                            | -                         | -           | aHUS <sup>1</sup>                   |
|          | <i>VWF</i>   | c.2561 G>A   | p.R854Q   | 4                            | 0.0056                    | rs41276738  | Von Willebrand disease <sup>2</sup> |
| 2        | <i>C8A</i>   | c.1331 G>A   | p.R444H   | 6                            | 0.0050                    | rs143908758 | -                                   |
|          | <i>CFHR5</i> | c.832 G>A    | p.G278S   | 4                            | 0.0088                    | rs139017763 | -                                   |
|          | <i>PLG</i>   | c.505 C>T    | p.P169S   | 4                            | 0.0005                    | rs143256245 | -                                   |
| 3        | <i>CFI</i>   | c.355 G>A    | p.G119R   | 3                            | 0.0013                    | rs141853578 | aHUS <sup>1</sup>                   |
|          | <i>CFI</i>   | c.859 G>A    | p.G287R   | 5                            | 0.0001                    | rs182078921 | aHUS <sup>1</sup>                   |
|          | <i>THBD</i>  | c.1502 C>T   | p.P501L   | 3                            | 0.0029                    | rs1800579   | aHUS <sup>3</sup>                   |
| 4        | <i>CFH</i>   | c.1825 G>A   | p.V609I   | 1                            | 0.0006                    | rs148165372 | aHUS <sup>1</sup>                   |
|          | <i>CFHR5</i> | c.832 G>A    | p.G278S   | 4                            | 0.0088                    | rs139017763 | -                                   |
| 5        | <i>C9</i>    | c.460 C>T    | p.R154X   | -                            | 0.0002                    | rs144138616 | C9 deficiency <sup>4</sup>          |
|          | <i>PLG</i>   | c.2134 G>A   | p.G712R   | 3                            | 0.0007                    | -           | Plasminogen deficiency <sup>5</sup> |
| 6        | <i>CFH</i>   | c.3644 G>A   | p.R1215Q  | 2                            | -                         | -           | aHUS <sup>6</sup>                   |
|          | <i>PHB</i>   | c.128 G>T    | p.R43L    | 4                            | 0.0088                    | rs2233665   | -                                   |
| 7        | <i>C1S</i>   | c.943 G>A    | p.D315N   | 6                            | 0.0053                    | rs117907409 | -                                   |
|          | <i>C3</i>    | c.3085 G>A   | p.D1029N  | 6                            | -                         | -           | -                                   |
|          | <i>PLG</i>   | c.758 G>A    | p.R253H   | 5                            | 0.0006                    | rs143034754 | Plasminogen deficiency <sup>7</sup> |
| 8        | <i>CD46</i>  | c.565 T>G    | p.Y189D   | 5                            | -                         | -           | aHUS <sup>8</sup>                   |
|          | <i>F12</i>   | c.1681-1 G>A | -         | -                            | 0.0006                    | -           | Factor XII deficiency <sup>9</sup>  |
|          | <i>VWF</i>   | c.4165 G>C   | p.E1389Q  | 4                            | -                         | -           | -                                   |
| 9        | <i>CFH</i>   | c.3644 G>A   | p.R1215Q  | 2                            | -                         | -           | aHUS <sup>6</sup>                   |
|          | <i>CR1</i>   | c.4750 C>T   | p.R1584W  | 4                            | -                         | -           | -                                   |
| 10       | <i>CFH</i>   | c.1160-2 A>G | -         | -                            | -                         | -           | -                                   |
|          | <i>CR2</i>   | c.524 C>T    | p.P175L   | 4                            | 0.0074                    | rs75282758  | -                                   |
| 11       | <i>C3</i>    | c.4855 A>C   | p.S1619R  | 4                            | 0.0028                    | rs2230210   | -                                   |
|          | <i>CFH</i>   | c.3583 G>T   | p.E1195X  | -                            | -                         | -           | aHUS <sup>1</sup>                   |
|          | <i>MASP1</i> | c.1770delG   | p.G590fs  | -                            | -                         | -           | -                                   |
| 12       | <i>CFH</i>   | c.3514 G>T   | p.E1172X  | -                            | -                         | rs121913060 | aHUS <sup>10</sup>                  |
|          | <i>CFH</i>   | c.595 A>G    | p.S199G   | 4                            | -                         | -           | -                                   |

All variants are heterozygous.

<sup>1</sup> PS calculated using PhyloP, SIFT, PolyPhen2, LRT, MutationTaster and GERP++. The mean PS of predicted deleterious missense nsSNVs is 4.57.

<sup>2</sup> Minor allele frequency values in the European-American population are from Exome Variant Server (EVS). N.D., no data. Novel variants are those not reported in the EVS, 1000 Genomes and dbSNP databases.

Supplemental table 3: Deleterious variants in 23 genes identified in 25 patients

| Genes        | Reported disease related variants | Predicted deleterious novel variants | Predicted deleterious rare variants | Total |
|--------------|-----------------------------------|--------------------------------------|-------------------------------------|-------|
| <i>CFH</i>   | 9                                 | 2                                    | 0                                   | 11    |
| <i>PLG</i>   | 3                                 | 0                                    | 1                                   | 4     |
| <i>CD46</i>  | 3                                 | 0                                    | 0                                   | 3     |
| <i>C3</i>    | 0                                 | 1                                    | 1                                   | 2     |
| <i>CFI</i>   | 2                                 | 0                                    | 0                                   | 2     |
| <i>MASP2</i> | 0                                 | 1                                    | 1                                   | 2     |
| <i>VWF</i>   | 1                                 | 1                                    | 0                                   | 2     |
| <i>C1S</i>   | 0                                 | 0                                    | 2                                   | 2     |
| <i>C2</i>    | 0                                 | 1                                    | 0                                   | 1     |
| <i>C3AR1</i> | 0                                 | 0                                    | 1                                   | 1     |
| <i>C8A</i>   | 0                                 | 0                                    | 1                                   | 1     |
| <i>C9</i>    | 1                                 | 0                                    | 0                                   | 1     |
| <i>CFB</i>   | 1                                 | 0                                    | 0                                   | 1     |
| <i>CFHR5</i> | 0                                 | 0                                    | 2                                   | 2     |
| <i>CR1</i>   | 0                                 | 1                                    | 0                                   | 1     |
| <i>CR2</i>   | 0                                 | 0                                    | 1                                   | 1     |
| <i>F12</i>   | 1                                 | 0                                    | 0                                   | 1     |
| <i>FCN1</i>  | 0                                 | 0                                    | 1                                   | 1     |
| <i>MASP1</i> | 0                                 | 1                                    | 0                                   | 1     |
| <i>PHB</i>   | 0                                 | 0                                    | 1                                   | 1     |
| <i>THBD</i>  | 1                                 | 0                                    | 0                                   | 1     |

Deleterious variants include reported DRVs, predicted deleterious novel mutations (PS > 4) and predicted deleterious rare variants (PS > 4)

## REFERENCE

1. Maga, TK, Nishimura, CJ, Weaver, AE, Frees, KL, Smith, RJ: Mutations in alternative pathway complement proteins in American patients with atypical hemolytic uremic syndrome. *Human mutation*, 31: E1445-1460, 2010.
2. Gaucher, C, Mercier, B, Jorieux, S, Oufkir, D, Mazurier, C: Identification of two point mutations in the von Willebrand factor gene of three families with the 'Normandy' variant of von Willebrand disease. *British journal of haematology*, 78: 506-514, 1991.
3. Delvaeye, M, Noris, M, De Vriese, A, Esmon, CT, Esmon, NL, Ferrell, G, Del-Favero, J, Plaisance, S, Claes, B, Lambrechts, D, Zoja, C, Remuzzi, G, Conway, EM: Thrombomodulin mutations in atypical hemolytic-uremic syndrome. *The New England journal of medicine*, 361: 345-357, 2009.
4. Witzel-Schlomp, K, Spath, PJ, Hobart, MJ, Fernie, BA, Rittner, C, Kaufmann, T, Schneider, PM: The human complement C9 gene: identification of two mutations causing deficiency and revision of the gene structure. *Journal of immunology*, 158: 5043-5049, 1997.
5. Tefs, K, Tait, CR, Walker, ID, Pietzsch, N, Ziegler, M, Schuster, V: A K19E missense mutation in the plasminogen gene is a common cause of familial hypoplasminogenaemia. *Blood coagulation & fibrinolysis : an international journal in haemostasis and thrombosis*, 14: 411-416, 2003.
6. Jalanko, H, Peltonen, S, Koskinen, A, Puntila, J, Isoniemi, H, Holmberg, C, Pinomaki, A, Armstrong, E, Koivusalo, A, Tukiainen, E, Makisalo, H, Saland, J, Remuzzi, G, de Cordoba, S, Lassila, R, Meri, S, Jokiranta, TS: Successful liver-kidney transplantation in two children with aHUS caused by a mutation in complement factor H. *American journal of transplantation : official journal of the American Society of Transplantation and the American Society of Transplant Surgeons*, 8: 216-221, 2008.
7. Tefs, K, Gueorguieva, M, Klammt, J, Allen, CM, Aktas, D, Anlar, FY, Aydogdu, SD, Brown, D, Ciftci, E, Contarini, P, Dempfle, CE, Dostalek, M, Eisert, S, Gokbuget, A, Gunhan, O, Hidayat, AA, Hugle, B, Isikoglu, M, Irkec, M, Joss, SK, Klebe, S, Kneppo, C, Kurtulus, I, Mehta, RP, Ornek, K, Schneppenheim, R, Seregard, S, Sweeney, E, Turtschi, S, Veres, G, Zeitler, P, Ziegler, M, Schuster, V: Molecular and clinical spectrum of type I plasminogen deficiency: A series of 50 patients. *Blood*, 108: 3021-3026, 2006.
8. Fremeaux-Bacchi, V, Moulton, EA, Kavanagh, D, Dragon-Durey, MA, Blouin, J, Caudy, A, Arzouk, N, Cleper, R, Francois, M, Guest, G, Pourrat, J, Seligman, R, Fridman, WH, Loirat, C, Atkinson, JP: Genetic and functional analyses of membrane cofactor protein (CD46) mutations in atypical hemolytic uremic syndrome. *Journal of the American Society of Nephrology : JASN*, 17: 2017-2025, 2006.
9. Schloesser, M, Hofferbert, S, Bartz, U, Lutze, G, Lammle, B, Engel, W: The novel acceptor splice site mutation 11396(G-->A) in the factor XII gene causes a truncated transcript in cross-reacting material negative patients. *Human molecular genetics*, 4: 1235-1237, 1995.
10. Manuelian, T, Hellwage, J, Meri, S, Caprioli, J, Noris, M, Heinen, S, Jozsi, M, Neumann, HP, Remuzzi, G, Zipfel, PF: Mutations in factor H reduce binding affinity to C3b and heparin and surface attachment to endothelial cells in hemolytic uremic syndrome. *The Journal of clinical investigation*, 111: 1181-1190, 2003.
